# Supplementary material for: A versatile system to record cell-cell interactions
Source: eLife journal article supplement (doi:10.7554/elife.61080), 2020-10-07
Supplement: supp [file elife-61080-supp-v1.zip]

Archive with 9 entries (9 files):
- elife_poa_e61080_Video_1.mov
- elife_poa_e61080_Transparent_Reporting_File.docx
- elife_poa_e61080_Supplementary_file_1.xlsx
- elife_poa_e61080_Supplementary_file_2.xlsx
- elife_poa_e61080_Figure_1_figure_supplement_1.pdf
- elife_poa_e61080_Figure_1_figure_supplement_2.pdf
- elife_poa_e61080_Figure_5_figure_supplement_1.pdf
- elife_poa_e61080_Figure_6_figure_supplement_1.pdf
- elife_poa_e61080_Figure_6_figure_supplement_2.pdf
