# Supplementary material for: A versatile system to record cell-cell interactions
Source: eLife journal article supplement (doi:10.7554/elife.61080), 2020-10-07
Supplement: supp [file elife-61080-supp-v1.zip › elife_poa_e61080_Figure_1_figure_supplement_2.pdf]

|                                                       | <b>synNotch</b><br>(Morsut <i>et al.</i> , Cell, 2016)                                                                                           | <b>LIPSTIC</b><br>(Pasqual <i>et al.</i> , Nature, 2018)                                                                            | <b>G-baToN</b><br>(This Paper)                                                                                                                                                     |
|-------------------------------------------------------|--------------------------------------------------------------------------------------------------------------------------------------------------|-------------------------------------------------------------------------------------------------------------------------------------|------------------------------------------------------------------------------------------------------------------------------------------------------------------------------------|
| <b>Cell-cell interaction</b>                          | 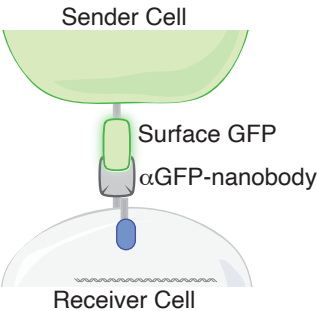                                                                | 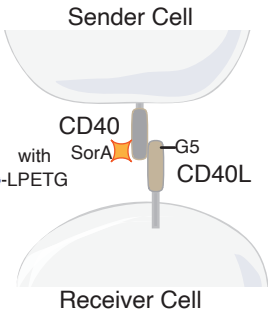                                                  | 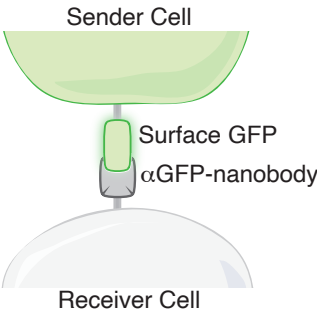                                                                                                |
| <b>Receiver Cell after interaction</b>                | 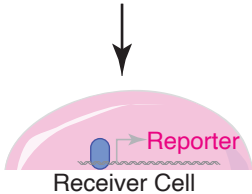                                                                | 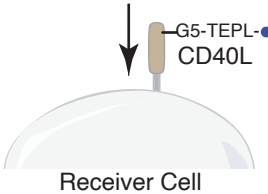                                                  | 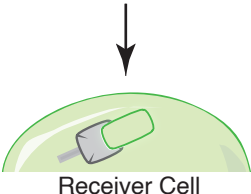                                                                                                |
| <b>Basis of the labeling</b>                          | Notch intracellular cleavage leads to transcription factor release and activation of a reporter                                                  | Covalent labeling of receptor by ligand associated enzyme                                                                           | Ligand internalization                                                                                                                                                             |
| <b>Additional requirement for labeling</b>            | Engineered reporter in receiver cells                                                                                                            | Labeling substrate                                                                                                                  | None                                                                                                                                                                               |
| <b>Determinants of label half-life after touching</b> | Transcription factor half-life and reporter mRNA and protein half-life in the receiver cell                                                      | Labeled protein half-life on the receiver cell                                                                                      | Half-life of transferred protein or fluorophore in the receiver cell                                                                                                               |
| <b>Advantages</b>                                     | Generic sender and receivers<br>Generalizable across cell type<br>Compatible with AND gates<br>Tf can drive expression of many genes of interest | Requirement for exogenous substrate adds temporal control of labelling<br>Conceptually generalizable to other receptor ligand pairs | Simple two-component system<br>Low background<br>Single cell level sensitivity<br>Generalizable across cell type<br>Generic sender and receivers<br>Complex cell-cell interactions |
| <b>Potential disadvantages</b>                        | Engineered ligand-receptor interactions could influence cell-cell contact<br>Background activation or reporter could be leaky                    | Requires knowledge of receptor-ligand interactions between cell types of interest                                                   | Engineered ligand-receptor interactions could influence cell-cell contact                                                                                                          |

**Figure 1 - figure supplement 2. Features of the synNotch, LIPSTIC, and G-baToN cell-cell interaction reporter systems.**  
Overview of systems that enable labeling of cells after cell-cell contact.
