# Supplementary material for: A versatile system to record cell-cell interactions
Source: eLife journal article supplement (doi:10.7554/elife.61080), 2020-10-07
Supplement: supp [file elife-61080-supp-v1.zip › elife_poa_e61080_Figure_5_figure_supplement_1.pdf]

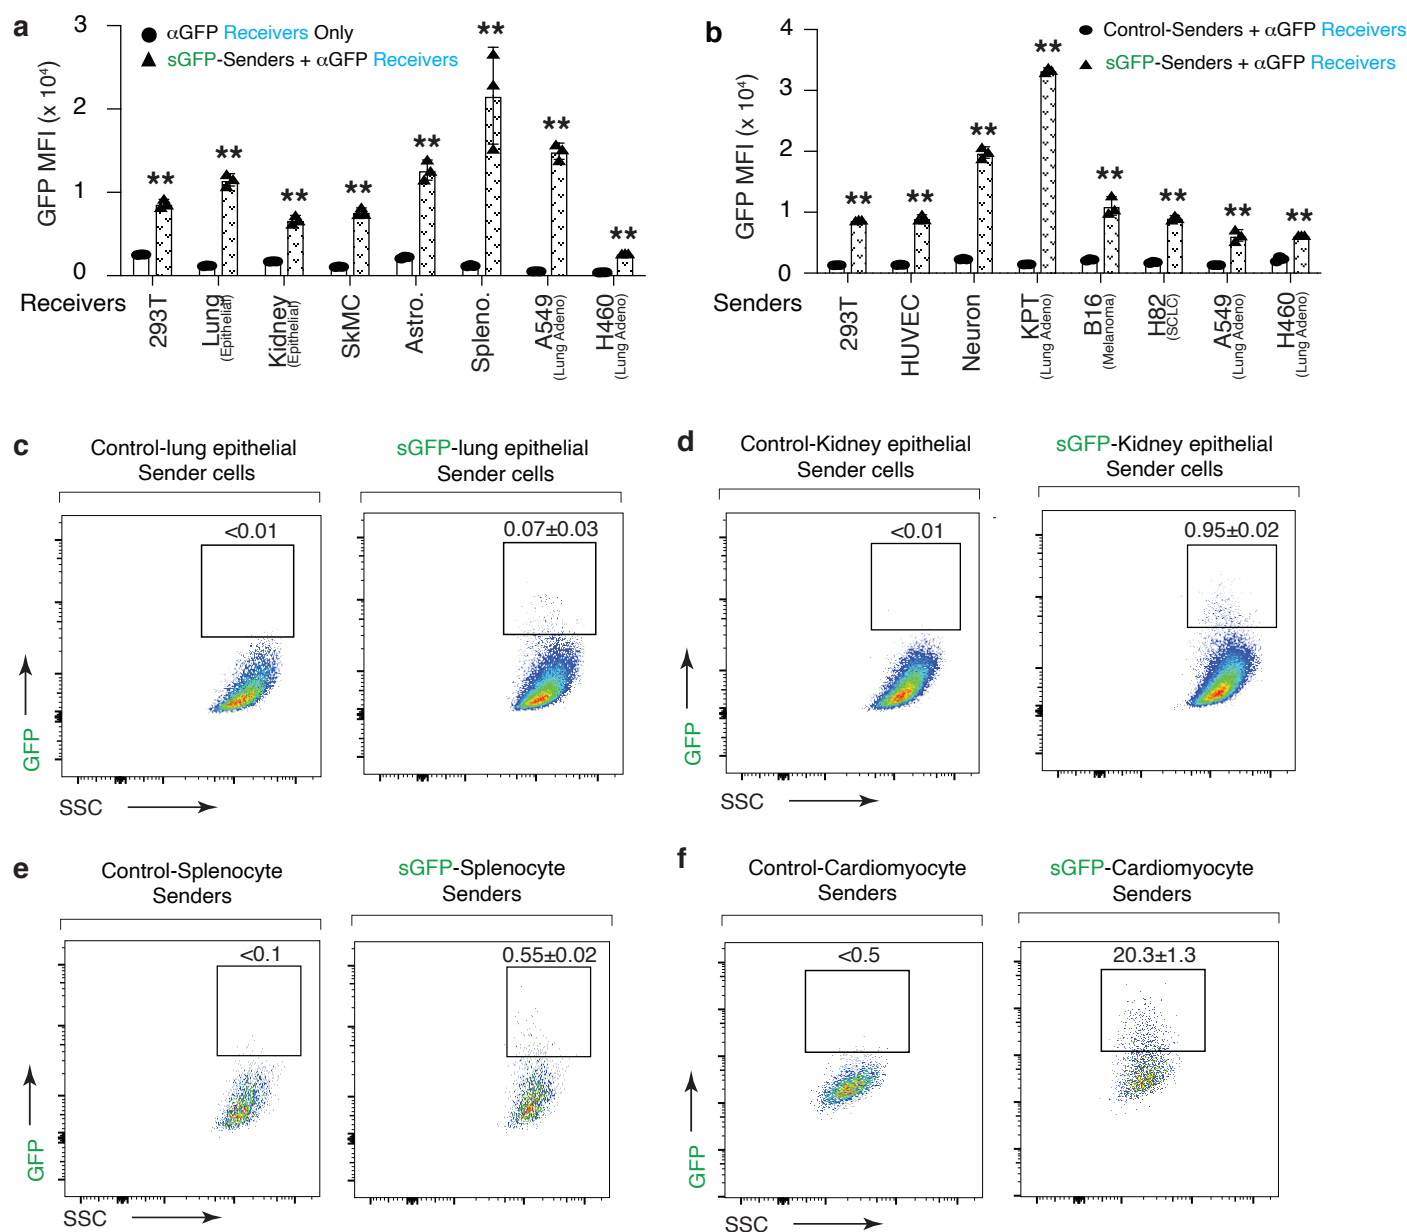

**Figure 5 - figure supplement 1. G-baToN is a generalized system that can be used for touching-based labeling between various cell types.**

**a.** Many different cell lines and primary cell types can serve as receiver cells. Receiver cells expressing αGFP were co-cultured with sGFP-expressing *KPT* sender cells for 24 hours. MFI of GFP on Tomato<sup>neg</sup>PI<sup>neg</sup>BFP<sup>pos</sup> receiver cells was assessed by FACS analysis. For lung epithelial cells and kidney epithelial cells MFI of GFP on Tomato<sup>neg</sup>PI<sup>neg</sup>BFP<sup>pos</sup>EpCAM<sup>pos</sup> cells is shown as mean ± SD of triplicate cultures. SkMC: skeletal muscle cells. Astro: Astrocytes. Spleno: splenocytes. \*\* p < 0.01, n = 3.

**b.** Many different cell lines and primary cell types can serve as sender cells. Sender cells expressing sGFP were co-cultured with αGFP 293 receiver cells for 24 hours. MFI of GFP on mCherry<sup>neg</sup>PI<sup>neg</sup>BFP<sup>pos</sup> receiver cells was assessed by FACS analysis. Mean ± SD of triplicate cultures is shown. \*\* p < 0.01, n = 3.

**c,d,e,f.** Diverse primary mouse cells expressing sGFP can transfer GFP to αGFP 293 receivers. Different primary sender cells were first sorted based on their cell surface markers, then transduced with lentiviral vectors expressing sGFP before being co-cultured with αGFP 293 receiver cells for 24 hours. Percentage of mCherry<sup>neg</sup>PI<sup>neg</sup>BFP<sup>pos</sup>GFP<sup>pos</sup> receiver cells was assessed by flow cytometry. For each primary sender, approximate sGFP<sup>pos</sup> sender : αGFP<sup>pos</sup> receiver ratio is indicated: **c.** Lung epithelial cells (1:180) (sorted EpCAM<sup>pos</sup> cells from dissociated adult lung); **d.** Kidney epithelial cells (1:20) (sorted EpCAM<sup>pos</sup> cells from dissociated adult kidney); **e.** Splenocyte (1:20); **f.** Cardiomyocyte (1:5) (sorted Sirpa<sup>pos</sup> cells from dissociated adult heart). Percent of labeled cells is indicated as mean ± SD of triplicate cultures.
