# Supplementary material for: A versatile system to record cell-cell interactions
Source: eLife journal article supplement (doi:10.7554/elife.61080), 2020-10-07
Supplement: supp [file elife-61080-supp-v1.zip › elife_poa_e61080_Figure_6_figure_supplement_1.pdf]

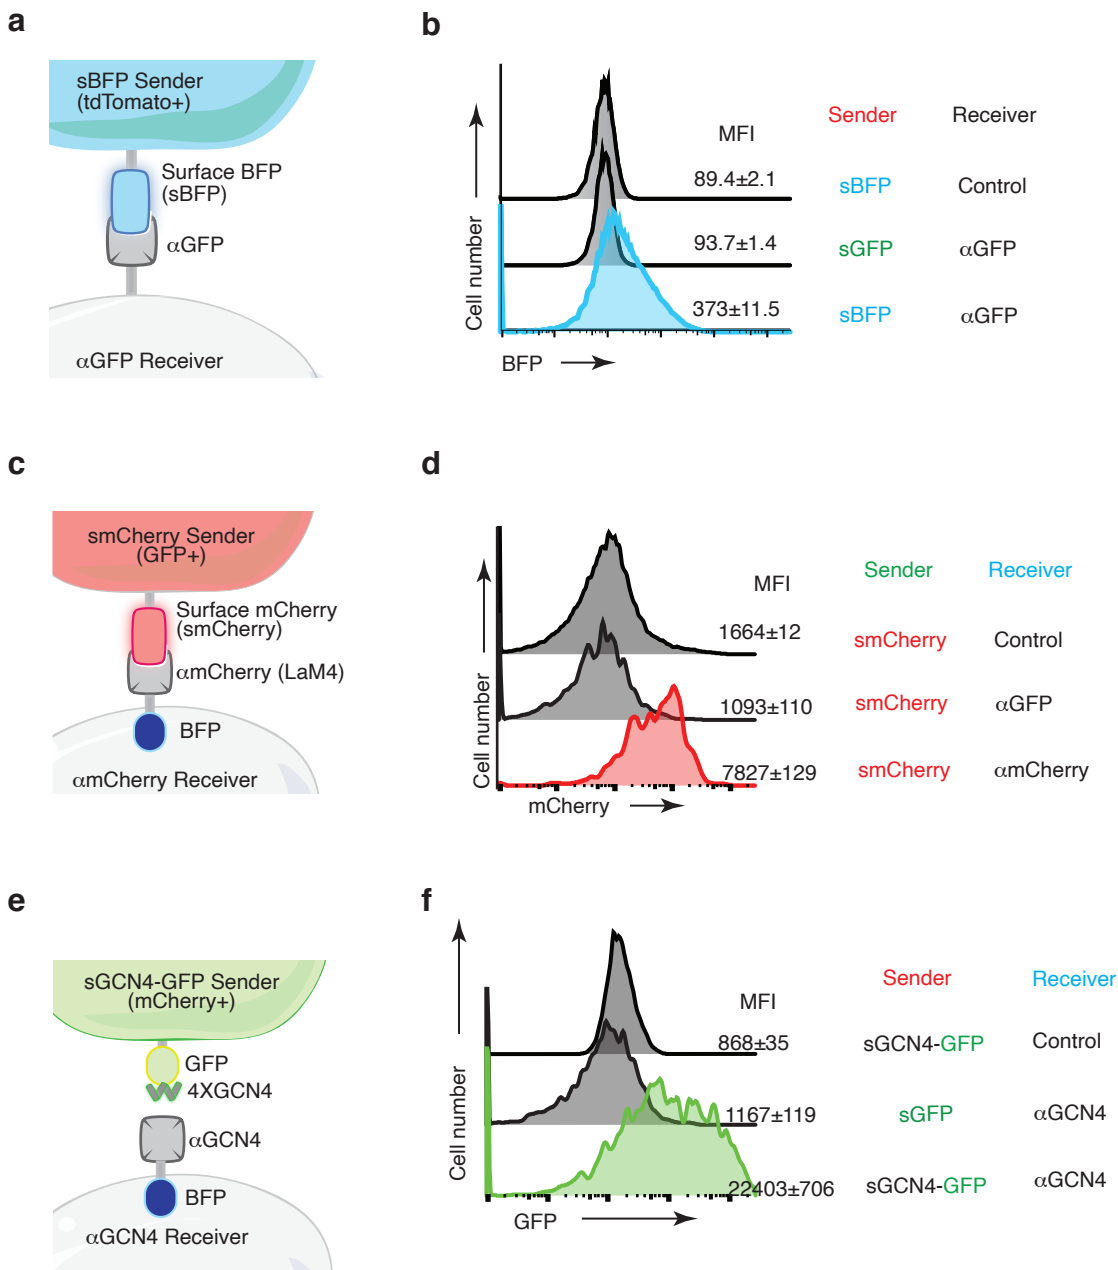

**Figure 6 - figure supplement 1. X-baToN systems enable fluorescent labeling via various antigen-nanobody/scFV pairs.**

**a.** Schematic of the surface BFP (sBFP)-baToN system. Sender cells (marked by intracellular tdTomato+) express sBFP and receiver cells express  $\alpha$ GFP.

**b.** The cross reactivity of  $\alpha$ GFP with BFP allows BFP to be transferred from sBFP sender cells to  $\alpha$ GFP receiver cells. sBFP sender cells and  $\alpha$ GFP receiver cells were co-cultured at 1:1 ratio for 24 hours. Receivers were defined as toTomato<sup>neg</sup>BFP<sup>neg</sup> cells. BFP MFI of receiver cells is shown as mean  $\pm$  SD of triplicate cultures.

**c.** Schematic of the surface mCherry (smCherry)-baToN system. Sender cells (marked by intracellular GFP) express smCherry and receiver cells express  $\alpha$ mCherry (tagged by intracellular BFP).

**d.** The pairing between mCherry and  $\alpha$ mCherry enable mCherry transfer from smCherry 293 Sender cells to  $\alpha$ mCherry-expressing 293 Receiver cells. smCherry sender cells are not able to transfer mCherry to  $\alpha$ GFP receiver cells. smCherry sender cells were co-cultured with  $\alpha$ GFP or  $\alpha$ mCherry receiver cells at a 1:1 ratio for 24 hours. Receiver cells were defined as GFP<sup>neg</sup>BFP<sup>pos</sup> cells. mCherry MFI of receiver cell is shown as mean  $\pm$  SD of triplicate cultures.

**e.** Schematic of the surface GCN4 (sGCN4)-baToN system. Sender cells (marked by intracellular 2A-mCherry) express cell surface 4X GCN4 peptide fused with GFP. Receiver cells express a cell surface anti-GCN4 single-chain variable fragment (scFV;  $\alpha$ GCN4, tagged by intracellular BFP).

**f.** The pairing between GCN4 and  $\alpha$ GCN4 enables co-transfer of GFP from 4X sGCN4-GFP sender cells to  $\alpha$ GCN4 receiver cells 24 hours after co-culture at a 1:1 ratio. Receiver cells were defined as mCherry<sup>neg</sup>PI<sup>neg</sup>BFP<sup>pos</sup> cells. GFP MFI of receiver cells are shown as mean  $\pm$  SD of triplicate cultures. sGFP sender cells are not able to transfer GFP to  $\alpha$ GCN4 receiver cells.
