# Supplementary material for: A versatile system to record cell-cell interactions
Source: eLife journal article supplement (doi:10.7554/elife.61080), 2020-10-07
Supplement: supp [file elife-61080-supp-v1.zip › elife_poa_e61080_Figure_6_figure_supplement_2.pdf]

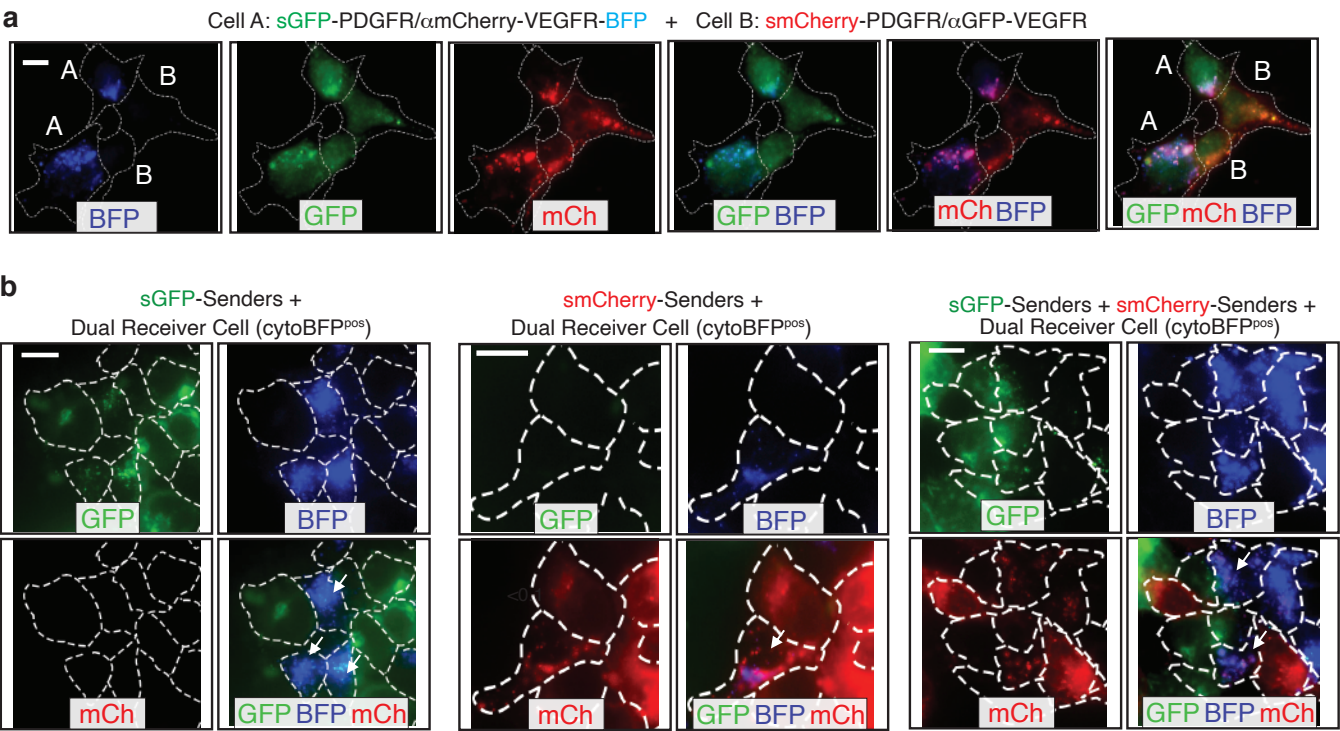

**Figure 6 - figure supplement 2. Dual color-baToN systems enable labeling in complex cell-cell interaction systems.**  
**a.** Representative image of reciprocal labeling of cell A and cell B co-cultured for 24 hours. Cells are outlined with a white dashed line. Cell A is BFP and GFP double positive and Cell B is mCherry positive. Touched cell A is BFP, GFP and mCherry triple positive and touched cell B is GFP and mCherry double positive (pointed out by white letter). Scale bar: 10  $\mu$ m.  
**b.** Representative image of dual receiver cells co-cultured with indicated sender cells. Cells are outlined with a white dashed line. Dual receiver cells are BFP positive and sender touched dual receiver cells are pointed out by white arrows. Scale bar: 10  $\mu$ m.
